# Supplementary material for: Measuring Spatial Accessibility of Health Care Providers – Introduction of a Variable Distance Decay Function within the Floating Catchment Area (FCA) Method
Source: PLoS One. 2016 Jul 8;11(7):e0159148. doi: 10.1371/journal.pone.0159148 (PMC4938577; doi:10.1371/journal.pone.0159148)
Supplement: S1 Table — (XLSX) [file pone.0159148.s002.xlsx]

## Sheet: Tabelle1
Ward Name	Ward ID	iFCA	2SFCA	E2SFCA	M2SFCA
Stülerstr.	01011101	0.80892	0.00073	0.0009	0.00058
Großer Tiergarten	01011102	0.66116	0.00073	0.00079	0.00044
Lützowstr.	01011103	0.79077	0.00073	0.00091	0.00058
Körnerstr.	01011104	0.7837	0.00073	0.00092	0.00059
Unter den Linden Nord	01011202	0.75337	0.00073	0.00094	0.00059
Unter den Linden Süd	01011203	0.74887	0.00073	0.00094	0.0006
Leipziger Str.	01011204	0.74203	0.00073	0.00093	0.00058
Charitéviertel	01011301	0.77822	0.00073	0.00092	0.00058
Oranienburger Str.	01011302	0.74886	0.00073	0.00088	0.00053
Alexanderplatzviertel	01011303	0.72907	0.00073	0.00084	0.0005
Karl-Marx-Allee	01011304	0.80495	0.00073	0.00088	0.00056
Heine-Viertel West	01011305	0.76461	0.00073	0.00089	0.00056
Heine-Viertel Ost	01011306	0.7902	0.00073	0.00088	0.00055
Invalidenstr.	01011401	0.78752	0.00073	0.0009	0.00057
Arkonaplatz	01011402	0.77477	0.00073	0.00086	0.00052
Huttenkiez	01022101	0.84323	0.00072	0.00083	0.00052
Beusselkiez	01022102	0.73423	0.00072	0.00077	0.00042
Westhafen	01022103	0.80864	0.00072	0.0008	0.00047
Emdener Str.	01022104	0.5701	0.0007	0.00065	0.0003
Zwinglistr.	01022105	0.79515	0.00072	0.00082	0.00049
Elberfelder Str.	01022106	0.81853	0.00073	0.00085	0.00054
Stephankiez	01022201	0.78413	0.00073	0.00085	0.00051
Heidestr.	01022202	0.7681	0.00073	0.00086	0.00052
Lübecker Str.	01022203	0.77488	0.00072	0.00083	0.00049
Thomasiusstr.	01022204	0.80427	0.00073	0.00088	0.00055
Zillesiedlung	01022205	0.76944	0.00073	0.00087	0.00053
Lüneburger Str.	01022206	0.76501	0.00073	0.0009	0.00056
Hansaviertel	01022207	0.79576	0.00073	0.00085	0.00053
Soldiner Str.	01033101	0.70623	0.00072	0.00074	0.0004
Humboldthain Süd	01033202	0.7688	0.00073	0.00086	0.00052
Humboldthain NW	01033203	0.78444	0.00073	0.00086	0.00052
Rehberge	01044101	0.42167	0.00064	0.0005	0.0002
Schillerpark	01044102	0.78393	0.00072	0.00077	0.00044
Westl. Müllerstr.	01044103	0.83752	0.00072	0.00084	0.00051
Sparrplatz	01044202	0.80913	0.00073	0.00085	0.00051
Reichenberger Straße	02030401	0.71779	0.00072	0.00081	0.00049
Wrangelkiez	02030402	0.59636	0.00071	0.0007	0.00034
Askanischer Platz	02010101	0.70347	0.00073	0.00086	0.00051
Mehringplatz	02010102	0.75377	0.00073	0.00091	0.00057
Moritzplatz	02010103	0.76567	0.00073	0.00089	0.00056
Wassertorplatz	02010104	0.75297	0.00073	0.00088	0.00055
Gleisdreieck/Entwickl.-gebiet	02020201	0.66882	0.00073	0.00081	0.00046
Oranienplatz	02030301	0.77719	0.00073	0.00088	0.00055
Lausitzer Platz	02030302	0.75408	0.00072	0.00084	0.00052
Barnimkiez	02040501	0.5855	0.00071	0.00068	0.00033
Friedenstraße	02040502	0.81006	0.00072	0.00085	0.00054
Richard-Sorge-Viertel	02040503	0.78267	0.00072	0.00082	0.0005
Andreasviertel	02040701	0.80642	0.00072	0.00087	0.00055
Weberwiese	02040702	0.78939	0.00072	0.00083	0.00051
Wriezener Bahnh./Entwickl.-geb.	02040703	0.74809	0.00072	0.00082	0.00048
Hausburgviertel	02050601	0.7893	0.00072	0.00082	0.0005
Samariterviertel	02050602	0.77792	0.00072	0.00081	0.00047
Traveplatz	02050801	0.77532	0.00072	0.00081	0.00047
Boxhagener Platz	02050802	0.76974	0.00072	0.00082	0.00048
Stralauer Kiez	02050803	0.7513	0.00072	0.00081	0.00047
Bucher Forst	03010101	0.36446	0.00053	0.00034	0.00013
Buch	03010102	0.32607	0.00051	0.00032	0.00013
Lietzengraben	03010104	0.24157	0.00048	0.00028	9e-05
Blankenfelde	03020203	0.54026	0.00063	0.00046	0.0002
Niederschönhausen	03020209	0.67601	0.00069	0.00063	0.00031
Herthaplatz	03020210	0.69979	0.00069	0.00064	0.00031
Buchholz	03020307	0.6461	0.00067	0.00055	0.00025
Karow-Nord	03030405	0.46207	0.00058	0.0004	0.00017
Alt-Karow	03030406	0.53501	0.00062	0.00045	0.0002
Blankenburg	03030711	0.6858	0.00068	0.00059	0.00028
Heinersdorf	03030715	0.76476	0.00071	0.00071	0.00037
Märchenland	03030716	0.56994	0.00064	0.00051	0.00023
Rosenthal	03040508	0.66455	0.00069	0.00063	0.00031
Wilhelmsruh	03040512	0.71425	0.00071	0.0007	0.00037
Schönholz	03040513	0.54477	0.00068	0.00058	0.00026
Pankow-Zentrum	03040614	0.63363	0.0007	0.00065	0.00031
Gustav-Adolf-Straße	03050919	0.75786	0.00071	0.00074	0.00041
Weißer See	03050920	0.76751	0.00071	0.00075	0.00042
Weißenseer Spitze	03050923	0.77916	0.00071	0.00077	0.00045
Behaimstraße	03050924	0.76706	0.00071	0.00076	0.00044
Komp.-viertel Weißensee	03050925	0.74684	0.00071	0.00075	0.00041
Rennbahnstraße	03051017	0.73504	0.00071	0.00071	0.00038
Buschallee	03051021	0.70793	0.0007	0.00069	0.00036
Hansastraße	03051022	0.69295	0.0007	0.00068	0.00035
Arnimplatz	03061126	0.75293	0.00072	0.00077	0.00045
Falkplatz	03061131	0.77557	0.00073	0.0008	0.00048
Humannplatz	03061227	0.79054	0.00071	0.00078	0.00047
Erich-Weinert-Straße	03061228	0.7818	0.00072	0.00079	0.00047
Helmholtzplatz	03061332	0.75584	0.00071	0.00078	0.00046
Greifswalder Straße	03061429	0.75682	0.00072	0.00077	0.00044
Volkspark Prenzlauer Berg	03061430	0.76361	0.00072	0.00079	0.00045
Anton-Saefkow-Park	03061434	0.79268	0.00072	0.00082	0.0005
Conrad-Blenkle-Straße	03061435	0.79927	0.00072	0.00083	0.00051
Eldenaer Straße	03061441	0.76404	0.00072	0.0008	0.00046
Teutoburger Platz	03071536	0.78021	0.00073	0.00084	0.00051
Kollwitzplatz	03071537	0.79951	0.00073	0.00085	0.00053
Thälmannpark	03071633	0.79068	0.00072	0.00082	0.0005
Winsstraße	03071638	0.78931	0.00072	0.00084	0.00052
Bötzowstraße	03071639	0.79347	0.00072	0.00084	0.00052
Jungfernheide	04010101	0.81287	0.0007	0.00074	0.0004
Angerburger Allee	04020206	0.7954	0.00066	0.00066	0.00033
Flatowallee	04020207	0.80078	0.00067	0.0007	0.00036
Eichkamp	04020209	0.82938	0.00068	0.00074	0.00041
Kranzallee	04020208	0.77112	0.00066	0.00067	0.00033
Park Ruhwald	04020310	0.49545	0.00063	0.0005	0.00021
Reichsstraße	04020311	0.92314	0.00071	0.00082	0.00047
Branitzer Platz	04020312	0.91914	0.00071	0.00081	0.00047
Königin-Elisabeth-Straße	04020313	0.95886	0.00072	0.00085	0.00054
Messegelände	04020314	0.827	0.00069	0.00076	0.00042
Plötzensee	04010102	0.73817	0.0007	0.00073	0.00038
Paul-Hertz-Siedlung	04010103	0.67084	0.00068	0.00067	0.00032
Schloßgarten	04030415	0.54378	0.00065	0.00058	0.00025
Klausenerplatz	04030416	0.67077	0.00067	0.00066	0.00033
Schloßstraße	04030417	0.8104	0.00071	0.00078	0.00044
Tegeler Weg	04030518	0.87692	0.00072	0.00082	0.00051
Kaiserin-Augusta-Allee	04030519	0.72947	0.00071	0.00074	0.0004
Alt-Lietzow	04030620	0.87996	0.00073	0.00084	0.00053
Spreestadt	04030621	0.85635	0.00073	0.00085	0.00056
Richard-Wagner-Straße	04030622	0.89081	0.00073	0.00084	0.00053
Karl-August-Platz	04030827	0.81664	0.00072	0.00078	0.00047
Lietzensee	04030724	0.80669	0.0007	0.00076	0.00043
Amtsgerichtsplatz	04030725	0.90505	0.00072	0.00084	0.00053
Droysenstraße	04030726	0.88019	0.00072	0.00082	0.00051
Hindemithplatz	04030929	0.88253	0.00072	0.00083	0.00052
Halensee	04031032	0.91693	0.00072	0.00084	0.00053
Flinsberger Platz	04041137	0.86379	0.00071	0.00079	0.00048
Kissinger Straße	04041238	0.86118	0.00071	0.0008	0.00048
Stadion Wilmersdorf	04041239	0.88707	0.00071	0.00082	0.00051
Messelpark	04041240	0.84674	0.00069	0.00078	0.00045
Breite Straße	04041241	0.8753	0.00071	0.00081	0.00049
Schlangenbader Straße	04041342	0.83784	0.0007	0.00079	0.00046
Binger Straße	04041343	0.87333	0.00071	0.00081	0.0005
Rüdesheimer Platz	04041344	0.89555	0.00072	0.00083	0.00053
Eisenzahnstraße	04051445	0.90595	0.00073	0.00083	0.00054
Preußenpark	04051446	0.8897	0.00073	0.00084	0.00055
Ludwigkirchplatz	04051447	0.85716	0.00073	0.00084	0.00054
Schaperstraße	04051448	0.80274	0.00073	0.00083	0.00052
Leon-Jessel-Platz	04051550	0.67963	0.00069	0.00071	0.00037
Nikolsburger Platz	04051652	0.88137	0.00073	0.00085	0.00055
Prager Platz	04051653	0.85006	0.00073	0.00085	0.00054
Wilhelmsaue	04051654	0.89218	0.00073	0.00086	0.00055
Babelsberger Straße	04051655	0.80854	0.00072	0.00081	0.00048
Hildegardstraße	04051656	0.90462	0.00072	0.00085	0.00055
Forst Grunewald	04061757	0.30378	0.00056	0.00038	0.00012
Freiheit	05010339	0.82282	0.00066	0.00068	0.00036
Maulbeerallee	05020523	0.62899	0.00061	0.00049	0.00024
Weinmeisterhornweg	05020524	0.66252	0.00061	0.00052	0.00025
Borkumer Str.	05020625	0.6917	0.00062	0.00054	0.00028
Adamstr.	05020626	0.73443	0.00063	0.00057	0.0003
Tiefenwerder	05020627	0.73576	0.00064	0.00058	0.0003
Graetschelsteig	05020628	0.71699	0.00063	0.00055	0.00028
Börnicker Str.	05020629	0.73285	0.00063	0.00056	0.00029
Alt-Gatow	05040934	0.52074	0.00056	0.00041	0.00019
Groß-Glienicker Weg	05040935	0.45288	0.00053	0.00036	0.00016
Jägerallee	05040936	0.26849	0.00031	0.00021	8e-05
Kladower Damm	05040937	0.29945	0.00035	0.00023	0.00011
Kafkastr.	05040938	0.28018	0.00032	0.00022	0.0001
Fichtenberg	06010101	0.89128	0.00071	0.00081	0.0005
Schloßstr.	06010102	0.88387	0.00071	0.00081	0.00049
Markelstr.	06010103	0.88969	0.00071	0.00082	0.00051
Munsterdamm	06010204	0.81977	0.00071	0.00078	0.00046
Südende	06010205	0.80012	0.00071	0.00075	0.00044
Bergstr.	06010208	0.88096	0.00071	0.00082	0.0005
Feuerbachstr.	06010209	0.86813	0.00072	0.00082	0.0005
Bismarckstr.	06010210	0.87295	0.00072	0.00083	0.00051
Thermometersiedlung	06020407	0.61503	0.00062	0.00052	0.00027
Lichterfelde-Süd	06020408	0.64616	0.00065	0.00056	0.00029
Botanischer Garten	06030605	0.85582	0.0007	0.00078	0.00045
Hindenburgdamm	06030606	0.79724	0.0007	0.00074	0.00041
Goerzwerke	06030607	0.61077	0.00063	0.00053	0.00027
Schweizer Viertel	06030608	0.4841	0.0006	0.00046	0.00019
Augustaplatz	06030609	0.8124	0.0007	0.00075	0.00042
Lichterfelde-West	06030610	0.75603	0.00067	0.00067	0.00037
Berlepschstr.	06030501	0.50268	0.0006	0.00044	0.0002
Zehlendorf-Süd	06030502	0.53205	0.00061	0.00046	0.00021
Zehlendorf-Mitte	06030503	0.71698	0.00066	0.0006	0.00033
Teltower Damm	06030504	0.62227	0.00064	0.00053	0.00027
Krumme Lanke	06040804	0.54067	0.00062	0.00046	0.00022
Fischerhüttenstr.	06040805	0.6566	0.00064	0.00057	0.00028
Thielallee	06040809	0.77384	0.00067	0.00069	0.00037
Dahlem	06040810	0.8221	0.00069	0.00076	0.00043
Friedenau	07030301	0.89919	0.00072	0.00084	0.00054
Neu-Tempelhof	07040401	0.75992	0.00073	0.0008	0.00046
Germaniagarten	07040406	0.75836	0.00073	0.00078	0.00044
Silbersteinstraße	08010118	0.75596	0.00074	0.00082	0.00048
Glasower Straße	08010214	0.77138	0.00074	0.00082	0.00048
Reuterkiez	08010301	0.74774	0.00072	0.00082	0.0005
Bouchéstraße	08010302	0.73899	0.00072	0.0008	0.00047
Gewerbegeb. Köllnische Heide	08010510	0.74698	0.00073	0.00078	0.00045
Gropiusstadt Süd	08030830	0.62176	0.0007	0.00064	0.00031
Gropiusstadt Ost	08030831	0.61067	0.0007	0.00062	0.0003
Elsenstr.	09010101	0.28102	0.00064	0.00042	0.00016
Am Treptower Park Nord	09010102	0.53264	0.00068	0.00064	0.00028
Am Treptower Park Süd	09010201	0.7429	0.00072	0.0008	0.00044
Köpenicker Landstraße	09010202	0.73329	0.00072	0.00079	0.00042
Baumschulenstraße	09010301	0.72864	0.00071	0.00076	0.00041
Späthsfelde	09010302	0.68199	0.00071	0.0007	0.00036
Johannisthal West	09010401	0.69465	0.00071	0.0007	0.00036
Johannisthal Ost	09010402	0.49427	0.00068	0.00057	0.00024
Oberschöneweide West	09020501	0.70996	0.00071	0.00074	0.00037
Oberschöneweide Ost	09020502	0.53411	0.00065	0.00056	0.00025
Adlershof West	09020701	0.60322	0.00069	0.00063	0.00029
Spindlersfeld	09020801	0.545	0.00063	0.00053	0.00025
Kölln. Vorstadt	09020802	0.54277	0.00064	0.00056	0.00025
Kölner Viertel	09030903	0.39202	0.00063	0.00045	0.00018
Bohnsdorf	09031001	0.29061	0.00058	0.00035	0.00014
Grünau	09031101	0.27784	0.00057	0.00035	0.00013
Karolinenhof	09031201	0.17718	0.00049	0.00027	9e-05
Schmöckw./Rauchf.-werder	09031202	0.06854	0.00024	0.00013	4e-05
Allende I	09041401	0.44097	0.00061	0.00045	0.0002
Allende II	09041402	0.45035	0.0006	0.00045	0.0002
Altstadt-Kietz	09041501	0.45801	0.00062	0.00046	0.00021
Müggelheim	09041601	0.14582	0.00032	0.00019	7e-05
Hirschgarten	09051701	0.29609	0.00049	0.00032	0.00013
Bölschestraße	09051702	0.26662	0.00046	0.00029	0.00012
Rahnsdorf/Hessenwinkel	09051801	0.16291	0.00025	0.00017	8e-05
Dammvorstadt	09051901	0.48651	0.00062	0.00047	0.00021
Köpenick-Nord	09052001	0.51303	0.00061	0.00047	0.00021
Havemannstr.	10010102	0.48435	0.00059	0.00046	0.00022
Wuhletalstr.	10010204	0.51286	0.00061	0.00048	0.00023
Ringkolonnaden	10010206	0.44401	0.00057	0.00043	0.0002
Marzahner Promenade	10010207	0.62835	0.00065	0.00057	0.0003
Marzahner Chaussee	10010308	0.71008	0.00067	0.00064	0.00034
Landsberger Tor	10010311	0.48124	0.00058	0.00046	0.00022
Hellersdorfer Promenade	10020415	0.44598	0.00056	0.00042	0.00021
Böhlener Str.	10020416	0.41131	0.00053	0.00039	0.00019
Schleipfuhl	10020518	0.39166	0.00049	0.00037	0.00018
Alt-Kaulsdorf	10040829	0.56462	0.00061	0.00051	0.00025
Kaulsdorf-Nord I	10020622	0.5155	0.0006	0.00048	0.00023
Rotes Viertel	10020623	0.51654	0.0006	0.00048	0.00024
Oberfeldstr.	10030724	0.65794	0.00065	0.00058	0.00031
Buckower Ring	10030725	0.54607	0.00062	0.0005	0.00024
Alt-Biesdorf	10030726	0.68499	0.00066	0.00061	0.00032
Biesdorf-Süd	10030727	0.62693	0.00064	0.00055	0.00027
Alt-Mahlsdorf	10040932	0.45359	0.00054	0.00043	0.0002
Dorf Malchow	11010101	0.70047	0.00069	0.00063	0.00032
Dorf Wartenberg	11010102	0.27657	0.00052	0.00034	0.00012
Dorf Falkenberg	11010103	0.38406	0.00057	0.0004	0.00016
Falkenberg Ost	11010204	0.56491	0.00063	0.00052	0.00025
Falkenberg West	11010205	0.58836	0.00064	0.00053	0.00026
Wartenberg Süd	11010206	0.62125	0.00065	0.00056	0.00028
Wartenberg Nord	11010207	0.63628	0.00066	0.00057	0.00028
Zingster Straße West	11010309	0.6888	0.00069	0.00065	0.00033
Zingster Straße Ost	11010308	0.64353	0.00067	0.0006	0.0003
Mühlengrund	11010310	0.65967	0.00066	0.0006	0.00031
Malchower Weg	11020411	0.70079	0.00068	0.00065	0.00034
Hauptstraße	11020412	0.71182	0.00069	0.00066	0.00035
Orankesee	11020513	0.45191	0.00064	0.00049	0.00021
Große-Leege-Straße	11020514	0.73114	0.00071	0.00072	0.00039
Landsberger Allee	11020515	0.76867	0.00071	0.00075	0.00042
Weiße Taube	11020516	0.74441	0.0007	0.0007	0.00038
Hohenschönhausener Str.	11030617	0.78581	0.00071	0.0008	0.00047
Fennpfuhl West	11030618	0.7026	0.00071	0.00074	0.0004
Fennpfuhl Ost	11030619	0.77505	0.00072	0.00078	0.00043
Frankfurter Allee Süd	11030824	0.75	0.00072	0.00076	0.00042
Victoriastadt	11040925	0.77608	0.00072	0.00079	0.00045
Weitlingstraße	11040926	0.73407	0.00071	0.00073	0.00038
Rosenfelder Ring	11041022	0.74696	0.00071	0.0007	0.00038
Gensinger Straße	11041023	0.66206	0.00067	0.00061	0.00031
Tierpark	11041027	0.30543	0.00055	0.00038	0.00014
Sewanstraße	11041128	0.67387	0.00068	0.00065	0.00034
Karlhorst West	11051330	0.63853	0.00067	0.0006	0.0003
Karlshorst Nord	11051331	0.63784	0.00067	0.00059	0.00029
Karlshorst Süd	11051332	0.64552	0.00069	0.00063	0.0003
Konradshöhe/Tegelort	12224229	0.3432	0.00057	0.00037	0.00014
Heiligensee	12224230	0.41613	0.00059	0.00042	0.00017
Hermsdorf	12231101	0.51666	0.00063	0.0005	0.00023
Frohnau	12231102	0.24139	0.00046	0.00026	0.0001
Wittenau-Süd	12301203	0.72387	0.0007	0.00067	0.00035
Wittenau-Nord	12301204	0.6953	0.00068	0.00064	0.00032
Lübars	12301206	0.47307	0.00061	0.00043	0.00019
George-Grosz-Platz	04030930	0.86847	0.00073	0.00085	0.00055
Breitscheidplatz	04030931	0.83918	0.00073	0.00087	0.00057
Alt-Lankwitz	06020301	0.72712	0.0007	0.00067	0.00037
Lankwitz-Kirche	06020303	0.75495	0.0007	0.00068	0.00039
Ceciliengärten	07030302	0.88651	0.00073	0.00087	0.00054
Grazer Platz	07030303	0.73701	0.00071	0.00075	0.0004
Kietzer Feld/Nachtheide	09041301	0.2707	0.00052	0.00033	0.00012
Wendenschloß	09041302	0.34057	0.00058	0.00039	0.00015
Ernst-Reuter-Platz	04030623	0.86057	0.00073	0.00084	0.00054
Savignyplatz	04030828	0.86307	0.00073	0.00084	0.00054
Kaulsdorf-Süd	10040830	0.46488	0.00058	0.00044	0.00019
Mahlsdorf-Süd	10040933	0.47317	0.00058	0.00044	0.0002
Rathaus Wilmersdorf	04051549	0.63499	0.00068	0.00067	0.00033
Brabanter Platz	04051551	0.91296	0.00072	0.00084	0.00055
Stralauer Halbinsel	02050804	0.728	0.00072	0.00078	0.00043
Rummelsburg	11051229	0.71864	0.00071	0.00073	0.00038
Siedlung Ruhleben	04020205	0.70479	0.00065	0.00064	0.0003
Olympiagelände	04020204	0.66125	0.00064	0.00059	0.00027
Güterbahnhof Grunewald	04041133	0.82723	0.00069	0.00076	0.00043
Bismarckallee	04041134	0.88076	0.00071	0.00081	0.00048
Nördl. Landwehrkanal	01011105	0.75652	0.00073	0.00091	0.00057
Wilhelmstr.	01011201	0.74697	0.00073	0.00095	0.0006
Gesundbrunnen	01033102	0.76695	0.00073	0.0008	0.00049
Brunnenstr.	01033201	0.68607	0.00071	0.00073	0.00042
Leopoldplatz	01044203	0.7581	0.00072	0.00077	0.00045
Reinickendorfer Str.	01044201	0.79541	0.00073	0.00083	0.0005
Viktoriapark	02020203	0.72133	0.00073	0.00081	0.00048
Rathaus Yorckstraße	02020202	0.76889	0.00073	0.00091	0.00058
Urbanstraße	02020204	0.76598	0.00073	0.0009	0.00057
Chamissokiez	02020205	0.76171	0.00073	0.00087	0.00055
Graefekiez	02020206	0.73973	0.00073	0.00085	0.00053
Pankow-Süd	03040818	0.77584	0.00071	0.00075	0.00042
Hundekehle	04041135	0.8062	0.00068	0.00074	0.00041
Hagenplatz	04041136	0.84517	0.00069	0.00076	0.00043
Goltzstraße	05010102	0.54849	0.0006	0.00048	0.00022
Hakenfelde Nord	05010101	0.37927	0.00052	0.00036	0.00014
Amorbacher Weg	05010103	0.56622	0.0006	0.00048	0.00023
Griesingerstr.	05010204	0.44241	0.00056	0.00041	0.00017
Gütersloher Weg	05010206	0.5219	0.00058	0.00045	0.0002
Darbystr.	05010207	0.5978	0.00061	0.00049	0.00024
Germersheimer Platz	05010208	0.65054	0.00062	0.00053	0.00027
An der Tränke	05010205	0.44367	0.00055	0.0004	0.00017
Eckschanze	05010310	0.6238	0.00061	0.00051	0.00025
Ackerstr.	05010313	0.68292	0.00063	0.00055	0.00028
Kurstr.	05010312	0.64066	0.00062	0.00052	0.00026
Eiswerder	05010311	0.59796	0.00061	0.0005	0.00024
Carl-Schurz-Str.	05010314	0.65023	0.00062	0.00052	0.00026
An der Kappe	05010209	0.47168	0.00057	0.00043	0.00018
Isenburger Weg	05020415	0.37387	0.00051	0.00033	0.00013
Am Heideberg	05020416	0.4776	0.00056	0.00041	0.00018
Staakener Str.	05020417	0.62312	0.00061	0.0005	0.00025
Spandauer Str.	05020418	0.50516	0.00057	0.00043	0.00019
Magistratsweg	05020419	0.55735	0.00059	0.00045	0.00021
Werkstr.	05020420	0.3568	0.00049	0.00031	0.00012
Döberitzer Weg	05020521	0.46555	0.00055	0.00039	0.00017
Pillnitzer Weg	05020522	0.56818	0.00059	0.00046	0.00021
Zitadellenweg	05030730	0.73965	0.00065	0.00061	0.00031
Gartenfelder Str.	05030731	0.82229	0.00067	0.00067	0.00035
Rohrdamm	05030832	0.84067	0.00068	0.00073	0.00038
Motardstr.	05030833	0.86656	0.00069	0.00075	0.0004
Stadtpark	06010206	0.77001	0.0007	0.00071	0.0004
Mittelstr.	06010207	0.8698	0.00071	0.0008	0.00048
Komponistenviertel Lankwitz	06020302	0.78868	0.0007	0.00071	0.0004
Königsberger Str.	06020409	0.76269	0.00068	0.00066	0.00038
Kaiser-Wilhelm-Str.	06020304	0.74429	0.00069	0.00066	0.00037
Gemeindepark Lankwitz	06020305	0.71131	0.00068	0.00063	0.00034
Lankwitz-Süd	06020306	0.62387	0.00065	0.00056	0.00028
Oberhofer Platz	06020410	0.70478	0.00067	0.00061	0.00034
Schütte-Lanz-Str.	06020411	0.45305	0.00059	0.00044	0.00018
Wannsee	06040701	0.18981	0.00043	0.00023	8e-05
Düppel	06040702	0.55565	0.00062	0.00047	0.00022
Nikolassee	06040703	0.37052	0.00059	0.0004	0.00015
Fischtal	06040806	0.71054	0.00065	0.00061	0.00031
Zehlendorf-Eiche	06040807	0.7353	0.00066	0.00064	0.00034
Hüttenweg	06040808	0.69757	0.00065	0.0006	0.0003
Wittenbergpl./Vikt.-Luise-Pl.	07010101	0.83462	0.00073	0.00089	0.00057
Nollendorfplatz	07010102	0.79976	0.00073	0.00088	0.00055
Barbarossaplatz	07010103	0.81735	0.00073	0.00087	0.00056
Dennewitzplatz	07010104	0.80931	0.00073	0.0009	0.00058
Bayerischer Platz	07020201	0.83871	0.00073	0.00086	0.00056
Volkspark (Rud.-Wilde-Park)	07020202	0.86313	0.00073	0.00087	0.00055
Kaiser-Wilhelm-Platz	07020203	0.82862	0.00073	0.00087	0.00056
Schöneberger Insel	07020204	0.82978	0.00073	0.00087	0.00055
Lindenhofsiedlung	07040402	0.80332	0.00073	0.00083	0.00048
Manteuffelstr.	07040403	0.83516	0.00073	0.00086	0.00052
Marienhöhe	07040404	0.65207	0.0007	0.00065	0.00033
Rathaus Tempelhof	07040405	0.79947	0.00073	0.00081	0.00047
Rathausstr.	07050501	0.79417	0.00072	0.00075	0.00043
Fritz-Werner-Str.	07050502	0.61523	0.00067	0.00059	0.00029
Eisenacher Str.	07050503	0.79921	0.00073	0.00078	0.00044
Imbrosweg	07050504	0.74745	0.00072	0.00073	0.0004
Hundsteinweg	07050505	0.68438	0.00069	0.00065	0.00033
Birnhornweg	07050506	0.66034	0.00068	0.00062	0.00032
Marienfelder Allee Nordwest	07060601	0.64344	0.00066	0.00058	0.0003
Kirchstr.	07060602	0.56801	0.00065	0.00053	0.00025
Marienfelde Nordost	07060603	0.62116	0.00066	0.00058	0.00029
Marienfelde Süd	07060604	0.29448	0.00051	0.00032	0.00012
Kettinger Str./Schillerstr.	07070701	0.56275	0.00065	0.00054	0.00026
Alt-Lichtenrade/Töpch. Weg	07070702	0.54863	0.00065	0.00054	0.00025
John-Locke-Str.	07070703	0.41375	0.00058	0.00042	0.00018
Nahariyastr.	07070704	0.43522	0.0006	0.00044	0.00019
Franziusweg/ Rohrbachstr.	07070705	0.41078	0.00057	0.00042	0.00018
Horstwald. Str./Paplitzer Str.	07070706	0.39208	0.00058	0.00041	0.00017
Wittelsbacherstr.	07070707	0.38813	0.00058	0.00042	0.00017
Hasenheide	08010115	0.69861	0.00073	0.00076	0.00044
Wissmannstraße	08010116	0.75092	0.00073	0.00083	0.00051
Schillerpromenade	08010117	0.7418	0.00073	0.0008	0.00048
Flughafenstraße	08010211	0.77494	0.00074	0.00084	0.00052
Donaustraße	08010303	0.75279	0.00072	0.00083	0.0005
Rollberg	08010212	0.76568	0.00074	0.00082	0.00049
Körnerpark	08010213	0.75729	0.00074	0.0008	0.00047
Rixdorf	08010404	0.74133	0.00072	0.00079	0.00045
Hertzbergplatz	08010405	0.75232	0.00072	0.00081	0.00047
Treptower Straße Nord	08010406	0.76038	0.00072	0.00081	0.00047
Gewerbegebiet Ederstraße	08010407	0.74201	0.00072	0.00079	0.00045
Weiße Siedlung	08010508	0.71296	0.00072	0.00077	0.00042
Schulenburgpark	08010509	0.7363	0.00071	0.00076	0.00043
Buschkrugallee Nord	08020619	0.71217	0.00073	0.00075	0.00041
Tempelhofer Weg	08020620	0.7866	0.00073	0.0008	0.00046
Mohriner Allee Nord	08020621	0.7004	0.00071	0.00069	0.00036
Parchimer Allee	08020622	0.6961	0.00072	0.00072	0.00038
Ortolanweg	08020623	0.57322	0.00071	0.00063	0.00029
Britzer Garten	08020624	0.20035	0.00052	0.00031	0.0001
Handwerker-Siedlung	08020625	0.65309	0.00071	0.00066	0.00034
Buckow West	08020726	0.5774	0.00067	0.00056	0.00026
Buckow Mitte	08020727	0.61469	0.00069	0.00061	0.00029
Buckow Ost	08020728	0.60313	0.0007	0.00061	0.00029
Gropiusstadt Nord	08030829	0.65667	0.00071	0.00066	0.00033
Goldhähnchenweg	08040932	0.68361	0.00071	0.0007	0.00037
Vogelviertel Süd	08040933	0.67191	0.00071	0.00068	0.00035
Vogelviertel Nord	08040934	0.66282	0.00071	0.00068	0.00035
Blumenviertel	08041035	0.66563	0.00071	0.00067	0.00034
Zittauer Straße	08041036	0.55629	0.00069	0.00058	0.00027
Alt-Rudow	08041037	0.61919	0.0007	0.00063	0.00031
Waltersdorfer Chaussee Ost	08041040	0.49009	0.00067	0.00053	0.00023
Waßmannsdorfer Chaussee	08041038	0.40357	0.00064	0.00048	0.00019
Frauenviertel	08041039	0.43103	0.00065	0.00049	0.0002
Schnellerstr	09020601	0.58578	0.00068	0.00061	0.00028
Oberspree	09020602	0.56886	0.00066	0.00059	0.00027
Adlershof Ost	09020702	0.56145	0.00066	0.00059	0.00026
Dorf Altglienicke	09030901	0.50375	0.00067	0.00055	0.00024
Wohngebiet II	09030902	0.30834	0.0006	0.00039	0.00015
Marzahn-West	10010101	0.52856	0.00061	0.00049	0.00024
Gewerbegeb. Bitterfelder Str.	10010203	0.64598	0.00065	0.00058	0.0003
Marzahn-Ost	10010205	0.37304	0.0005	0.00036	0.00016
Alt-Marzahn	10010310	0.52157	0.00062	0.0005	0.00023
Springpfuhl	10010309	0.65413	0.00066	0.0006	0.00031
Alte Hellersdorfer Straße	10020412	0.506	0.0006	0.00048	0.00024
Gut Hellersdorf	10020413	0.50476	0.00059	0.00048	0.00024
Helle Mitte	10020414	0.46173	0.00056	0.00044	0.00022
Boulevard Kastanienallee	10020519	0.3937	0.00049	0.00037	0.00018
Kaulsdorf-Nord II	10020620	0.49988	0.00059	0.00047	0.00024
Gelbes Viertel	10020621	0.49443	0.00058	0.00047	0.00023
Adele-Sandrock-Str.	10020517	0.40655	0.0005	0.00038	0.00019
Kaulsdorf-Nord	10040828	0.48704	0.00058	0.00046	0.00023
Mahlsdorf-Nord	10040931	0.38172	0.00047	0.00035	0.00017
Herzbergstraße	11030720	0.74531	0.00071	0.00071	0.00039
Rüdigerstraße	11030721	0.76025	0.00072	0.00075	0.00042
Tegel-Süd	12214126	0.32344	0.00059	0.0004	0.00014
Waidmannslust	12301205	0.7267	0.00068	0.00063	0.00032
Borsigwalde	12304313	0.61626	0.00066	0.00057	0.00028
Ziekowstraße/Freie Scholle	12304314	0.74255	0.00069	0.00067	0.00035
Humboldtstraße	12103220	0.67083	0.00068	0.00062	0.0003
Reinickes Hof	12214421	0.76052	0.00071	0.00071	0.00038
Mellerbogen	12214423	0.7696	0.0007	0.00071	0.00038
Alt-Tegel	12214527	0.75775	0.0007	0.00071	0.00037
Tegeler Forst	12214528	0.68451	0.00067	0.0006	0.00029
Lübarser Straße	12302211	0.39869	0.00059	0.00042	0.00016
Breitkopfbecken	12103115	0.65628	0.00068	0.00062	0.0003
Hausotterplatz	12103116	0.76025	0.00072	0.00074	0.00041
Letteplatz	12103117	0.76986	0.00072	0.00077	0.00043
Teichstraße	12103218	0.80035	0.00072	0.00078	0.00046
Schäfersee	12103219	0.75629	0.00071	0.00071	0.00039
Klixstraße	12214422	0.80752	0.00072	0.00077	0.00044
Scharnweberstr.	12214424	0.75477	0.0007	0.00071	0.00037
Rollbergesiedlung	12302212	0.81777	0.00071	0.00075	0.00043
Schorfheidestr.	12302107	0.58525	0.00066	0.00055	0.00026
Märkisches Zentrum	12302108	0.6896	0.00069	0.00065	0.00032
Treuenbrietzener Str.	12302109	0.60326	0.00067	0.00057	0.00027
Dannenwalder Weg	12302110	0.63632	0.00067	0.0006	0.00029
Waldidyll/Flughafensee	12214125	0.6573	0.00068	0.00063	0.0003
